# Supplementary material for: Effects of Physical Exercise on Cerebral Blood Velocity in Older Adults: A Systematic Review and Meta−Analysis
Source: MDPI journal article supplement (doi:10.3390/bs13100847), 2023-10-16
Supplement: s1 [file s1]

Table S3. Certainty assessment using GRADEpro.

| Certainty assessment    |                   |              |               |              |             |                      | № of patients |             | Effect            |                                                        | Certainty    | Importance |
|-------------------------|-------------------|--------------|---------------|--------------|-------------|----------------------|---------------|-------------|-------------------|--------------------------------------------------------|--------------|------------|
| № of studies            | Study design      | Risk of bias | Inconsistency | Indirectness | Imprecision | Other considerations | Exercise      | No exercise | Relative (95% CI) | Absolute (95% CI)                                      |              |            |
| Cerebral blood velocity |                   |              |               |              |             |                      |               |             |                   |                                                        |              |            |
| 4                       | randomized trials | not serious  | not serious   | not serious  | serious     | strong association   | 94            | 89          | -                 | MD 3.58 cm/s<br>higher<br>(0.51 higher to 6.65 higher) | ⊕⊕⊕⊕<br>High | IMPORTANT  |

CI: confidence interval; MD: mean difference
