# Supplementary material for: Effects of Physical Exercise on Cerebral Blood Velocity in Older Adults: A Systematic Review and Meta−Analysis
Source: Behav Sci (Basel). 2023 Oct 16;13(10):847. doi: 10.3390/bs13100847 (PMC10604216; doi:10.3390/bs13100847)
Supplement: Supplementary file 1 [file behavsci-13-00847-s001.zip]

Archive with 4 entries (4 files):
- Figure S1.pdf
- Table S2.pdf
- Table S3.pdf
- Talbe S1.pdf
