# Supplementary figures and images for: Effects of Physical Exercise on Cerebral Blood Velocity in Older Adults: A Systematic Review and Meta−Analysis
Source: MDPI journal article supplement (doi:10.3390/bs13100847), 2023-10-16

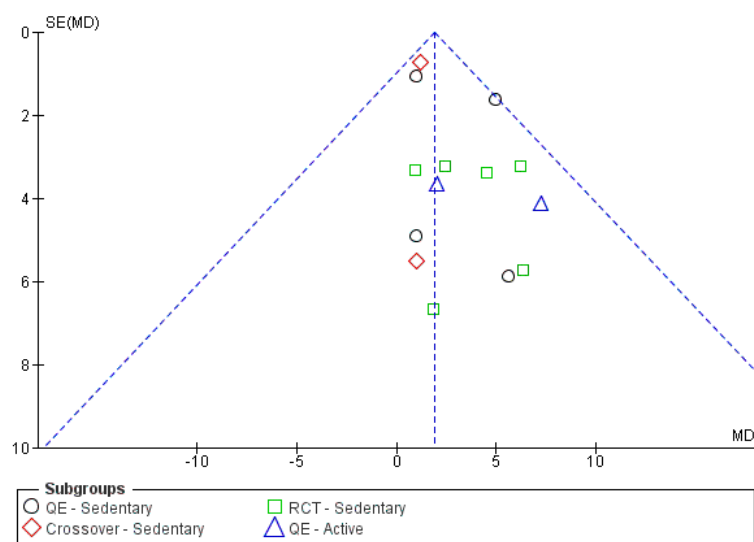

**Figure S1.** Funnel plot assessing potential publication bias.

Supplement: s1 [file s1]
